# Supplementary material
Source: PubMed Central journal article supplement (PMC3525293)
Supplement: supp_WNL.0b013e31826d5f95_Deconditioning-Orthostatic.pdf [file supp_WNL.0b013e31826d5f95_Deconditioning-Orthostatic.pdf]

## Deconditioning in patients with orthostatic intolerance

### ضعف الحالة البدنية الناجم عن قلة النشاط الحركي عند المرضى المصابين بعدم تحمل هبوط الضغط الانتصابي

غاية الدراسة:

دراسة مدى انتشار و درجة ضعف الفعالية البدنية، الأعراض السريرية، و العلاقة بين هذا الضعف و مشعرات الجملة الذاتية عند مرضى عدم تحمل هبوط الضغط الانتصابي.

الوسائل:

تمت الدراسة بشكل راجع لكل المرضى المصابين بعدم تحمل هبوط الضغط الانتصابي الذين تمت معاينتهم في مركز مايو كلينيك الطبي بين كانون الثاني 2006 و حزيران 2011 ممن خضعوا لكل من اختباري الجملة الذاتية و الجهد القياسيين.

النتائج:

شملت الدراسة 184 مريضاً (84 مريضاً منهم مصابين بمتلازمة تسرع القلب المترافق مع هبوط الضغط الانتصابي الوضعي و 100 آخرين من دون تسرع قلب عند الانتصاب). شكلت نسبة الإناث 89%، و المتوسط العمري 27.5 سنة (المدى الربعي IQR 22-37). كانت مدة الأعراض 4 سنوات (IQR 2-7.8). عانى 90% من هؤلاء المرضى من تناقص اللياقة ضمن اختبار الجهد (نقصان قبط الأوكسجين الأعظمي  $[Vo2max\% > 85\%]$ ). لم تتعلق هذه الملاحظة بالعمر، الجنس أو مدة المرض. كان شيعوع تناقص الفعالية البدنية متمثالاً عند مرضى تسرع القلب المترافق مع هبوط الضغط الانتصابي (95%) و عند المصابين بعدم تحمل هبوط الضغط الانتصابي (91%). كانت هناك علاقة ضعيفة بين  $Vo2 max\%$  و عدد قليل من مشعرات الجملة الذاتية و المشعرات المخبرية. لكن لم يتم تحديد منبئات كافية ل  $Vo2max\%$ .

الخلاصة:

إن تناقص  $Vo2max\%$  المرتبط مع تناقص الفعالية البدنية متواجد عند كل المرضى المصابين بعدم تحمل هبوط الضغط الانتصابي تقريباً. و من المحتمل أن هذا التناقص يلعب دوراً محورياً في الفيزيولوجيا المرضية. تشكل هذه النتيجة سبباً منطقياً لتطبيق إعادة التأهيل في علاج مرضى عدم تحمل هبوط الضغط الانتصابي. ولا يعتبر أي من مؤشرات الجملة الذاتية منبئاً موثقاً لنقص الفعالية البدنية.

**Objective:** To study the frequency and degree of deconditioning, clinical features, and relationship between deconditioning and autonomic parameters in patients with orthostatic intolerance.

**Methods:** We retrospectively studied all patients seen for orthostatic intolerance at Mayo Clinic between January 2006 and June 2011, who underwent both standardized autonomic and exercise testing.

**Results:** A total of 184 patients (84 with postural orthostatic tachycardia syndrome [POTS] and 100 without orthostatic tachycardia) fulfilled the inclusion criteria. Of these, 89% were women, and median age was 27.5 years (interquartile range [IQR] 22–37 years). Symptom duration was 4 years (IQR 2–7.8). Of the patients, 90% had deconditioning (reduced maximum oxygen uptake  $[VO_{2max}\% < 85\%]$ ) during exercise. This finding was unrelated to age, gender, or duration of illness. The

prevalence of deconditioning was similar between those with POTS (95%) and those with orthostatic intolerance (91%).  $VO_{2max}\%$  had a weak correlation with a few autonomic and laboratory parameters but adequate predictors of  $VO_{2max}\%$  could not be identified.

**Conclusion:** Reduced  $VO_{2max}\%$  consistent with deconditioning is present in almost all patients with orthostatic intolerance and may play a central role in pathophysiology. This finding provides a strong rationale for retraining in the treatment of orthostatic intolerance. None of the autonomic indices are reliable predictors of deconditioning.

---

**Translator: Yousef Hannawi, MD, Department of Neurology, Baylor College of Medicine, Houston, TX.**

**Translation Reviewer: Mohamed Kazamel MD, Department of Neurology, University of Alabama, Birmingham, AL.**
